# Supplementary material
Source: PubMed Central journal article supplement (PMC9122524)
Supplement: sj-pdf-1-jcb-10.1177_0271678X211045848.pdf [file sj-pdf-1-jcb-10.1177_0271678X211045848.pdf]

## Supplemental Table

|                                          | Seven-to-Ten-Day Old<br>Term Lambs (n=4) |              | Preterm Lambs<br>(n=7) |              |
|------------------------------------------|------------------------------------------|--------------|------------------------|--------------|
|                                          | Start                                    | End          | Start                  | End          |
| <b>Weight (kg)</b>                       | 6.7 ± 2.0                                |              | 3.0 ± 0.5              |              |
| <b>pH</b>                                | 7.3 ± 0.1                                | 7.4 ± 0.1    | 7.4 ± 0.1              | 7.4 ± 0.1    |
| <b>pCO<sub>2</sub> (mmHg)</b>            | 38.6 ± 13.3                              | 45.9 ± 10.9  | 44.5 ± 7.6             | 45.0 ± 9.5   |
| <b>pO<sub>2</sub> (mmHg)</b>             | 181.8 ± 78.7                             | 129.5 ± 50.0 | 126.0 ± 85.1           | 78.4 ± 52.4  |
| <b>Hb (g/dl)</b>                         | 7.9 ± 0.7                                | 7.6 ± 1.2    | 11.3 ± 2.4             | 11.3 ± 2.6   |
| <b>O<sub>2</sub> Sat (%)</b>             | 92.9 ± 6.6                               | 97.8 ± 2.0   | 97.1 ± 2.5             | 95.9 ± 3.0   |
| <b>Base excess (mmol.L<sup>-1</sup>)</b> | -4.9 ± 2.0                               | -0.6 ± 1.4   | 2.5 ± 1.8              | 1.3 ± 3.3    |
| <b>MABP (mmHg)</b>                       | 57.3 ± 1.8                               | 54.8 ± 5.1   | 69.8 ± 2.6             | 61.4 ± 7.3*  |
| <b>HR (bpm)</b>                          | 173.5 ± 8.7                              | 168.3 ± 18.6 | 139.4 ± 14.6           | 144.6 ± 28.3 |

**Supplementary Table 1.** Seven-to-ten-day old term (n=4) and preterm lambs' (n=7) arterial blood gases, haemoglobin (Hb) level, arterial oxygen saturation (O<sub>2</sub> Sat), mean arterial blood pressure (MABP) and heart rate (HR) at the beginning and end of the experiment (values are mean ± SD). \* indicates significant difference between the start and end of experiment (p<0.05).
